# Supplementary material
Source: publisher figshare collection journal article supplement (https://acs.figshare.com/ndownloader/files/5793489)
Supplement: Supplementary file 1 [file 5793489]

#### Terms & Conditions

Electronic Supporting Information files are available without a subscription to ACS Web Editions. The American Chemical Society holds a copyright ownership interest in any copyrightable Supporting Information. Files available from the ACS website may be downloaded for personal use only. Users are not otherwise permitted to reproduce, republish, redistribute, or sell any Supporting Information from the ACS website, either in whole or in part, in either machine-readable form or any other form without permission from the American Chemical Society. For permission to reproduce, republish and redistribute this material, requesters must process their own requests via the RightsLink permission system. Information about how to use the RightsLink permission system can be found at <http://pubs.acs.org/page/copyright/permissions.html>

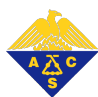

ACS Publications

MOST TRUSTED. MOST CITED. MOST READ.

Copyright © 1996 American Chemical Society

## Experimental Section

**General.**  $^1\text{H}$  NMR spectra were recorded at the indicated field strength as solutions in  $\text{CDCl}_3$  unless otherwise indicated. Chemical shifts are expressed in parts per million (ppm,  $\delta$ ) downfield from TMS and are referenced to  $\text{CHCl}_3$  (7.26 ppm) as internal standard. Splitting patterns are designated as s, singlet; d, doublet; t, triplet; q, quartet; m, multiplet; br, broad.  $^{13}\text{C}$  NMR spectra were recorded at the indicated field strength as solutions in  $\text{CDCl}_3$  unless otherwise indicated. Chemical shifts are reported in parts per million (ppm,  $\delta$ ) downfield from TMS and are referenced to the center line of  $\text{CDCl}_3$  (77.0 ppm) as internal standard. Carbon signals were assigned by a DEPT pulse sequence, q = methyl, t = methylene, d = methine, and s = quaternary.

### **(5*R*,6*S*)-(-)-5-Acetoxy-6-(acetoxymethyl)-1-(phenylmethyl)-2-piperidone**

To a stirred solution of (-)-**4**<sup>4</sup> (1.44 g, 6.13 mmol) in pyridine (10 mL) was added  $\text{Ac}_2\text{O}$  (6 mL, 63.59 mmol) at 0 °C, then the resulting mixture was stirred at room temperature for 18 h. The solvent was evaporated, and the residue was chromatographed on  $\text{SiO}_2$  (50 g, hexane:acetone=4:1) to give the diacetate (1.72 g, 88%) as a colorless oil.

IR (neat)  $\text{cm}^{-1}$ : 3063, 3030, 2960, 1738, 1650, 1469, 1454, 1416, 1367, 1236, 1187, 1055, 724;  $^1\text{H}$  NMR (500 MHz)  $\delta$ : 1.83 & 2.06 (each 3H, each s), 1.95-2.01 (1H, m), 2.13-2.20 (1H, m), 2.52 (1H, ddd,  $J$  = 18.0, 7.5, 2.1 Hz), 2.63 (1H, ddd,  $J$  = 18.0, 11.0, 7.5 Hz), 3.56-3.60 (1H, m), 3.88 (1H, d,  $J$  = 15.0 Hz), 4.10 (1H, dd,  $J$  = 11.9, 7.5 Hz), 4.20 (1H, dd,  $J$  = 11.9, 4.0 Hz), 5.05-5.07 (1H, m), 5.46 (1H, d,  $J$  = 15.0 Hz), 7.22-7.30 (5H, m);  $^{13}\text{C}$  NMR (75 MHz)  $\delta$ : 20.62 (q), 20.71 (q), 21.93 (t), 26.91 (t), 47.86 (t), 57.32 (d), 61.98 (t), 67.12 (d), 127.49 (d), 128.05 (d), 128.48 (d), 136.60 (s), 169.18 (s), 169.83 (s), 170.23 (s); MS: 320 ( $\text{M}^++1$ ), 319 ( $\text{M}^+$ ), 91 (100); HRMS: Calcd. for  $\text{C}_{17}\text{H}_{21}\text{NO}_5$ : 319.1419, Found: 319.1390;  $[\alpha]^{26}_{\text{D}}$  -55.0 ( $c$  2.15,  $\text{CHCl}_3$ ).

### **(5*R*,6*S*)-(-)-5-Acetoxy-6-(acetoxymethyl)-1-(phenylmethyl)-2-piperidinethione**

To a stirred solution of the diacetate (1.54 g, 4.83 mmol) in THF (20 mL) was added Lawesson's reagent (1.2 g, 2.90 mmol), then the resulting suspension was refluxed for 2 h. After cooling, the solvent was evaporated to give a pale yellow oil, which was chromatographed on  $\text{SiO}_2$  (50 g, hexane:acetone=10:1) to give the thiolactam (1.59 g, 99%) as a colorless oil.

IR (neat)  $\text{cm}^{-1}$ : 3062, 3029, 2946, 1746, 1596, 1495, 1454, 1413, 1367, 1300, 1235, 1173, 1123, 1050, 959, 923, 731, 704;  $^1\text{H}$  NMR (500 MHz)  $\delta$ : 1.82 & 2.10 (each 3H, each s), 1.86-1.95 (1H, m), 2.13-2.20 (1H, m), 3.19 (1H, ddd,  $J$  = 19.5, 7.5, 4.0 Hz), 3.27 (1H, ddd,  $J$  = 19.5, 9.6, 7.1 Hz), 3.79-3.82 (1H, m), 4.22 (1H, dd,  $J$  = 12.6, 7.0 Hz), 4.26 (1H, dd,  $J$  = 12.6, 4.5 Hz), 4.28 (1H, d,  $J$  = 15.0 Hz), 5.14 (1H, q-like,  $J$  = 2.2 Hz), 6.61 (1H, d,  $J$  = 15.0 Hz), 7.27-7.36 (5H, m);  $^{13}\text{C}$  NMR (75 MHz)  $\delta$ : 20.65 (q), 20.71 (q), 22.32 (t), 36.89 (t), 55.33 (t), 59.28 (d), 61.64 (t), 67.47 (d), 127.93 (d), 128.13 (d), 128.63 (d), 134.88 (s), 169.82 (s), 170.12 (s), 201.47 (s); MS: 336 ( $\text{M}^++1$ ), 335 ( $\text{M}^+$ ), 91 (100); HRMS: Calcd. for  $\text{C}_{17}\text{H}_{21}\text{NO}_4\text{S}$ : 335.1191, Found: 335.1149;  $[\alpha]^{26}_{\text{D}}$  -137.0 ( $c$  1.71,  $\text{CHCl}_3$ ).

### **Methyl (5*R*,6*S*)-(+)-5-Acetoxy-6-(acetoxymethyl)-1-(phenylmethyl)-2-piperidinylidenethanoate (5)**

To a stirred solution of the thiolactam (1.61 g, 4.83 mmol) in MeCN (20 mL) was added  $\text{BrCH}_2\text{CO}_2\text{Me}$  (0.55 mL, 5.77 mmol), then the resulting mixture was stirred at room temperature for 24 h. To the

reaction mixture was added  $\text{Ph}_3\text{P}$  (1.51 g, 5.77 mmol) and  $\text{Et}_3\text{N}$  (2.0 mL, 14.48 mmol), then the resulting suspension was refluxed for 24 h. After cooling, the solvent was evaporated, and the residue was chromatographed on  $\text{SiO}_2$  (70 g, hexane:acetone=50:1~12:1) to give (+)-**5** (1.66 g, 92%) as a colorless oil.

IR (neat)  $\text{cm}^{-1}$ : 3063, 2947, 1732, 1694, 1682, 1574, 1558, 1496, 1434, 1372, 1242, 1142, 1046, 942, 730, 697;  $^1\text{H}$  NMR (500 MHz)  $\delta$ : 1.85-1.92 (1H, m), 2.02 & 2.04 (each 3H, each s), 2.06-2.13 (1H, m), 3.13 (1H, dt,  $J = 18.0, 6.0$  Hz), 3.39 (1H, dddd,  $J = 18.0, 9.0, 6.0, 1.0$  Hz), 3.53 (1H, tdd,  $J = 7.0, 2.2, 1.0$  Hz), 3.55 (3H, s), 4.17 (1H, d,  $J = 6.0$  Hz), 4.28 (1H, d,  $J = 16.0$  Hz), 4.59 (1H, d,  $J = 16.0$  Hz), 4.72 (1H, br s), 5.10-5.13 (1H, m), 7.21 (2H, d-like,  $J = 8.0$  Hz), 7.25 (1H, t-like,  $J = 8.0$  Hz), 7.32 (2H, t-like,  $J = 8.0$  Hz);  $^{13}\text{C}$  NMR (75 MHz)  $\delta$ : 20.73 (q), 21.03 (q), 21.73 (t), 21.84 (t), 50.08 (q), 53.80 (t), 60.32 (d), 62.75 (t), 68.65 (d), 86.20 (d), 126.75 (d), 127.41 (d), 128.64 (d), 135.73 (s), 160.36 (s), 168.98 (s), 170.15 (s), 170.41 (s); MS: 375 ( $\text{M}^+$ ), 242 ( $\text{M}^+ - 133$ ), 91 (100); HRMS: Calcd. for  $\text{C}_{20}\text{H}_{25}\text{NO}_6$ : 375.1682, Found: 375.1723;  $[\alpha]^{26}_{\text{D}} +70.3$  (c 9.59,  $\text{CHCl}_3$ ).

**Methyl (5*R*,6*S*)-5-Acetoxy-6-(acetoxymethyl)-1-(phenylmethyl)piperidin-2-ethanoate**

To a stirred suspension of (+)-**5** (1.60 g, 4.27 mmol) in  $\text{CH}_2\text{Cl}_2$  (20 mL) and  $\text{NaBH}_3\text{CN}$  (95%, 440 mg, 6.65 mmol) was added dropwise TFA (1.0 mL, 13.0 mmol) at 0 °C, then the resulting suspension was stirred at 0 °C for 2 h. The reaction was quenched with satd.  $\text{NaHCO}_3$ , and the organic layer was separated. The aqueous layer was extracted with  $\text{CH}_2\text{Cl}_2$  (10 mL x 4), and the organic extracts were combined, dried, and evaporated to give a colorless oil, which was chromatographed on  $\text{SiO}_2$  (50 g, hexane:acetone=11:1) to afford the piperidine (1.34 g, 84%) as a 11:1 mixture of the *trans*(2,6)- and *cis*(2,6)-piperidines as a colorless oil.

**(4*aS*,6*R*,8*aR*)-(-)-Hexahydro-6-{2-(hydroxy)ethyl}-2,2-dimethyl-5-(phenylmethyl)-4*H*-1,3-dioxino[5,4-*b*]pyridine (6)**

To a stirred solution of the above mixture (1.0 g, 2.65 mmol) in THF (20 mL) was added  $\text{LiAlH}_4$  (300 mg, 7.96 mmol) at 0 °C, then the resulting suspension was refluxed for 18 h. After cooling, the reaction was quenched with 10% NaOH, and the residue was extracted with hot  $\text{CHCl}_3$  (10 mL x 10). The organic extracts were combined, dried, and evaporated to give a colorless oil, which was used directly in the next step. To a stirred solution of the above oil in  $\text{CH}_2\text{Cl}_2$  (30 mL) was added 2,2-dimethoxypropane (0.66 mL, 5.31 mmol), *p*-TsOH· $\text{H}_2\text{O}$  (760 mg, 3.98 mmol), and molecular sieves 5A (10 g), then the resulting suspension was stirred at room temperature for 20 h. The reaction was quenched with 15%  $\text{K}_2\text{CO}_3$ , and the organic layer was separated. The aqueous layer was extracted with  $\text{CHCl}_3$  (30 mL x 5), the organic extracts were combined, dried, and evaporated to give a pale yellow oil, which was chromatographed on  $\text{SiO}_2$  (40 g, hexane:acetone=12:1) to give (-)-**6** (606 mg, 75%) as a colorless oil.

IR (neat)  $\text{cm}^{-1}$ : 3423, 3061, 3027, 2992, 2941, 2874, 1378, 1265, 1202, 1167, 1093, 1040, 735, 700;  $^1\text{H}$  NMR (500 MHz)  $\delta$ : 1.40 & 1.49 (each 3H, each s), 1.42-1.51 (1H, m), 1.59-1.72 (2H, m), 1.78 (1H, dq,  $J = 13.0, 3.0$  Hz), 2.00 (1H, tt,  $J = 14.0, 5.0$  Hz), 2.11-2.18 (1H, m), 2.88 (1H, q-like,  $J = 6.0$  Hz), 2.98 (1H, td,  $J = 10.0, 5.0$  Hz), 3.07 (1H, br), 3.46 (1H, ddd,  $J = 11.0, 9.0, 4.5$  Hz), 3.63 (1H, dt,  $J = 10.8, 5.0$  Hz), 3.68 & 3.76 (2H, ABq,  $J = 13.2$  Hz), 3.79 & 3.84 (1H, ABq,  $J = 10.7$  Hz), 3.80 & 3.82 (1H, ABq,  $J = 11.0$  Hz), 3.90 (1H, td,  $J = 10.0, 4.5$  Hz), 7.23-7.34 (5H, m);  $^{13}\text{C}$  NMR (75 MHz)  $\delta$ : 19.33 (q), 24.67 (t), 26.22 (t), 28.59 (t), 29.44 (q), 52.76 (t), 54.68 (d), 55.07 (d),

62.10 (t), 62.89 (t), 69.03 (d), 98.61 (s), 127.17 (d), 128.31 (d), 128.46 (d), 139.57 (s); MS: 305 ( $M^+$ ), 91 (100); HRMS: Calcd. for  $C_{18}H_{27}NO_3$ : 305.2088, Found: 305.2045;  $[\alpha]^{26}_D$  -20.9 ( $c$  0.99,  $CHCl_3$ ).

**Ethyl (4a*S*,6*R*,8a*R*)-(+)-Hexahydro-2,2-dimethyl-5-(phenylmethyl)-4*H*-1,3-dioxino-[5,4-*b*]pyridine-6-but-(2*E*)-enoate (7)**

To a stirred solution of  $(COCl)_2$  (0.19 mL, 2.28 mmol) in  $CH_2Cl_2$  (5 mL) was added DMSO (0.32 mL, 4.56 mmol) at  $-78^\circ C$ , then the resulting mixture was stirred for 5 min. To the mixture was added (-)-6 (347 mg, 1.14 mmol) in  $CH_2Cl_2$  (5 mL) was added at  $-78^\circ C$ , then the mixture was stirred for 30 min. To the resulting mixture was added  $Et_3N$  (0.95 mL, 6.84 mmol) at  $-78^\circ C$ , then the temperature was raised gradually to  $0^\circ C$ . The reaction was quenched with satd.  $NaHCO_3$ , and the aqueous layer was extracted with  $Et_2O$  (20 mL x3). The organic extracts were combined, dried, and evaporated to give the crude aldehyde as a pale yellow oil. This aldehyde was used directly in the next step. To a stirred suspension of  $NaH$  (60%, 68 mg, 1.71 mmol) in THF (10 mL) was added  $(EtO)_2P(O)CH_2CO_2Et$  (0.37 mL, 1.82 mmol) at  $0^\circ C$ , then the reaction mixture was stirred at  $0^\circ C$  for 30 min. To the mixture was added the above aldehyde in THF (5 mL) at  $0^\circ C$ , then the mixture was stirred at room temperature for 40 h. The reaction was quenched with  $H_2O$ , and the aqueous layer was extracted with  $CH_2Cl_2$  (10 mL x 5). The organic extracts were combined, dried, and evaporated to give a pale yellow oil, which was chromatographed on  $SiO_2$  (20 g, hexane:acetone=50:1) to give (+)-7 (338 mg, 80%) as a colorless oil.

IR (neat)  $cm^{-1}$ : 3062, 3027, 2991, 2942, 2874, 1716, 1652, 1454, 1368, 1319, 1265, 1202, 1174, 1122, 1093, 1041, 985, 927, 868, 737, 700;  $^1H$  NMR (500 MHz)  $\delta$ : 1.27 (3H, t,  $J = 7.0$  Hz), 1.40 & 1.47 (each 3H, each s), 1.52-1.64 (2H, m), 1.68-1.74 (2H, m), 2.47-2.52 (2H, m), 2.69 (1H, td,  $J = 10.5, 4.5$  Hz), 2.82-2.86 (1H, m), 3.52 & 3.69 (2H, ABq,  $J = 14.0$  Hz), 3.59 (1H, t,  $J = 10.0$  Hz), 3.72 (1H, ddd,  $J = 11.0, 9.0, 4.5$  Hz), 3.88 (1H, dd,  $J = 10.9, 4.5$  Hz), 4.16 (2H, q,  $J = 7.0$  Hz), 5.79 (1H, dt-like,  $J = 15.0, 1.0$  Hz), 6.72 (1H, dt,  $J = 15.0, 8.0$  Hz), 7.22-7.31 (5H, m);  $^{13}C$  NMR (75 MHz)  $\delta$ : 14.17 (q), 19.17 (q), 25.02 (t), 25.46 (t), 26.25 (t), 29.50 (q), 52.95 (t), 55.18 (d), 55.91 (d), 60.13 (t), 63.93 (t), 72.11 (d), 98.47 (s), 122.89 (d), 126.99 (d), 127.98 (d), 128.29 (d), 139.33 (s), 146.88 (d), 166.19 (s); MS: 373 ( $M^+$ ), 91 (100); HRMS: Calcd. for  $C_{22}H_{31}NO_4$ : 373.2251, Found: 373.2232;  $[\alpha]^{26}_D$  +62.6 ( $c$  1.00,  $CHCl_3$ ).

**Trichloroethyl (4a*S*,6*S*,8a*R*)-(-)-Hexahydro-6-{4-(hydroxy)butyl}-2,2-dimethyl-4*H*-1,3-dioxino[5,4-*b*]pyridine-5-carboxylate (8)**

To a stirred solution of (+)-7 (300 mg, 0.80 mmol) in  $EtOH$  (10 mL) was added  $Pd(OH)_2$  (20 mg), then the resulting suspension was hydrogenated at 1 atm for 15 h. The catalyst was filtered off, and the filtrate was evaporated to give a colorless oil. To a stirred solution of the oil in THF (10 mL) was added  $LiAlH_4$  (61 mg, 1.60 mmol), then the resulting suspension was refluxed for 12 h. After cooling, the reaction was quenched with 10%  $NaOH$ , and the residue was extracted with hot  $CHCl_3$  (10 mL x 6). The organic extracts were combined, dried, and evaporated to afford a colorless oil, which was used directly in the next step. To a stirred solution of the above oil in  $CHCl_3$  (20 mL) and  $H_2O$  (2 mL) was added  $K_2CO_3$  (220 mg, 1.60 mmol) and  $TrocCl$  (0.22 mL, 1.60 mmol) at  $0^\circ C$ , then the resulting mixture was stirred at room temperature for 8 h. The organic layer was separated and the aqueous layer was extracted with  $CHCl_3$  (10 mL x 5). The organic extracts were combined, dried, and

evaporated to give a colorless oil, which was chromatographed on SiO<sub>2</sub> (15 g, hexane:acetone=11:1) to give (-)-8 (220 mg, 65%) as a colorless oil.

IR (neat) cm<sup>-1</sup>: 3446, 2994, 2939, 1717, 1424, 1382, 1266, 1204, 1098, 705; <sup>1</sup>H NMR (500 MHz) δ: 1.39 & 1.51 (each 3H, each s), 1.31-1.42 (2H, m), 1.55-1.70 (6H, m), 1.74-1.88 (3H, m), 3.23 (1H, td, *J* = 10.0, 4.5 Hz), 3.63 (2H, t-like, *J* = 6.2 Hz), 3.71 (1H, td, *J* = 10.5, 4.5 Hz), 4.36 & 4.44 (each 1H, each br), 4.59 (1H, t, *J* = 11.0 Hz), 4.66 & 4.72 (each 1H, each br); <sup>13</sup>C NMR (75 MHz) δ: 19.07 (q), 22.49 (t), 26.03 (t), 26.37 (t), 29.15 (t), 29.39 (q), 32.34 (t), 53.39 (d), 53.46 (d), 62.36 & 62.45 (each t, due to rotamers), 62.52 (t), 70.63 (d), 74.94 (s), 95.41 (s), 98.49 (s), 153.25 (s); [α]<sub>D</sub><sup>26</sup> -9.3 (c 2.24, CHCl<sub>3</sub>).

#### Phenyl sluphone (-)-9

To a stirred solution of (COCl)<sub>2</sub> (0.103 mL, 1.22 mmol) in CH<sub>2</sub>Cl<sub>2</sub> (2 mL) was added DMSO (0.17 mL, 2.44 mmol) at -78 °C, then the resulting mixture was stirred for 5 min. To the mixture was added (-)-8 (255 mg, 0.61 mmol) in CH<sub>2</sub>Cl<sub>2</sub> (2 mL) was added at -78 °C, then the mixture was stirred for 30 min. To the resulting mixture was added Et<sub>3</sub>N (0.51 mL, 3.66 mmol) at -78 °C, then the temperature was raised gradually to 0 °C. The reaction was quenched with H<sub>2</sub>O, and the aqueous layer was extracted with Et<sub>2</sub>O (20 mL x3). The organic extracts were combined, dried, and evaporated to give the crude aldehyde as a pale yellow oil. This aldehyde was used directly in the next step. To a stirred suspension of NaH (60%, 27 mg, 0.67 mmol) in THF (5 mL) was added (EtO)<sub>2</sub>P(O)CH<sub>2</sub>SO<sub>2</sub>Ph (214 mg, 0.73 mmol) at 0 °C, then the reaction mixture was stirred at 0 °C for 30 min. To the mixture was added the above aldehyde in THF (5 mL) at 0 °C, then the mixture was stirred at room temperature for 3 h. The reaction was quenched with H<sub>2</sub>O, and the aqueous layer was extracted with CH<sub>2</sub>Cl<sub>2</sub> (10 mL x 5). The organic extracts were combined, dried, and evaporated to give a pale yellow oil, which was chromatographed on SiO<sub>2</sub> (20 g, hexane:acetone=15:1) to give (-)-9 (266 mg, 80%) as a colorless oil.

IR (neat) cm<sup>-1</sup>: 2995, 2945, 2868, 1715, 1446, 1384, 1307, 1266, 1234, 1204, 1147, 1096, 753, 688; <sup>1</sup>H NMR (500 MHz) δ: 1.37 & 1.48 (each 3H, each s), 1.40-1.51 (3H, m), 1.55-1.64 (2H, m), 1.73-1.86 (3H, m), 2.26 (2H, q, *J* = 7.0 Hz), 3.14 (1H, td, *J* = 10.0, 4.5 Hz), 3.65-3.72 (1H, m), 4.29 (1H, br), 4.39 (1H, br), 4.56 (1H, br t-like, *J* = 11.0 Hz), 4.52-4.66 (1H, br), 4.71 (1H, d-like, *J* = 11.0 Hz), 6.30 (1H, dd-like, *J* = 14.0, 1.0 Hz), 6.93 (1H, dtd, *J* = 14.0, 6.5, 1.0 Hz), 7.52 (2H, tm, *J* = 8.0 Hz), 7.59 (1H, tm, *J* = 8.0 Hz), 7.84 (2H, dm, *J* = 8.0 Hz); <sup>13</sup>C NMR (125 MHz) δ: 19.01 (q), 22.53 (t), 24.18 (t), 25.95 & 26.46 (each t, due to rotamers), 28.66 & 29.34 (each t, due to rotamers), 29.34 (q), 30.97 & 31.45 (each t, due to rotamers), 52.93 (d), 53.37 (d), 62.20 (t), 70.40 (d), 74.75 (t), 95.47 (s), 98.45 (s), 127.45 (d), 129.20 (d), 130.84 (d), 133.25 (d), 140.38 (s), 145.98 (d); [α]<sub>D</sub><sup>26</sup> -3.77 (c 4.10, CHCl<sub>3</sub>).

#### Quinolizidine (-)-10

To a stirred solution of (-)-9 (278 mg, 0.50 mmol) in THF (6 mL) and 1N NH<sub>4</sub>OAc (6 mL) was added 10% Cd-Pb (440 mg), then the resulting suspension was stirred at room temperature for 24 h. To the suspension was added an additional 10% Cd-Pb (440 mg), then the suspension was stirred an additional 24 h. The insoluble material was removed through the celite pad, and the aqueous layer was extracted with CHCl<sub>3</sub> (15 mL x 4). The organic extracts were combined, dried, and evaporated to give a colorless oil, which was recrystallized from *i*-Pr<sub>2</sub>O-benzene-hexane to afford (-)-10 (127 mg, 67%) as

a colorless needle (mp 194~195 °C). The mother liquor was evaporated, and the residue was chromatographed on SiO<sub>2</sub> (10 g, hexane:acetone=17:1) to give (-)-**10** (48 mg, 25%) as an additional crops.

IR (KBr) cm<sup>-1</sup>: 3062, 2991, 2972, 2942, 2914, 2887, 2867, 1300, 1291, 1268, 1201, 1173, 1148, 1138, 1092, 1034, 865, 753; <sup>1</sup>H NMR (500 MHz) δ: 0.95 (1H, dm, *J* = 13.5 Hz), 1.00 (1H, tt, *J* = 14.0, 5.0 Hz), 1.25 (2H, tm, *J* = 17.0 Hz), 1.32-1.46 (2H, m), 1.38 & 1.44 (each 3H, each s), 1.48 & 1.53 (1H, each dt, *J* = 14.0, 4.0 Hz), 1.72 (1H, dm, *J* = 13.5 Hz), 1.75-1.89 (2H, m), 2.65 (1H, dm, *J* = 12.2 Hz), 2.78 (1H, td-like, *J* = 9.5, 4.5 Hz), 3.14 (1H, dd, *J* = 15.0, 5.0 Hz), 3.23 (1H, ddd, *J* = 11.0, 9.0, 4.2 Hz), 3.40 (1H, br dt-like, *J* = 8.0, 4.0 Hz), 3.48 (1H, t, *J* = 11.0 Hz), 3.74 (1H, dd, *J* = 14.0, 8.0 Hz), 3.90 (1H, dd, *J* = 11.0, 4.5 Hz), 7.56 (2H, t-like, *J* = 8.0, 1.0 Hz), 7.65 (1H, tt-like, *J* = 8.0, 1.1 Hz), 7.92 (2H, dm, *J* = 8.0 Hz); <sup>13</sup>C NMR (125 MHz) δ: 19.07 (q), 20.48 (t), 21.33 (t), 22.23 (t), 25.59 (t), 27.82 (t), 29.42 (q), 48.42 (d), 49.21 (d), 52.79 (d), 57.27 (t), 62.60 (t), 71.84 (d), 98.09 (s), 127.86 (d), 128.86 (d), 133.20 (d), 140.67 (s); MS: 379 (M<sup>+</sup>), 138 (100); HRMS: Calcd. for C<sub>20</sub>H<sub>29</sub>NO<sub>4</sub>S: 379.1817, Found: 379.1839; [α]<sub>D</sub><sup>26</sup> -44.5 (*c* 1.06, CHCl<sub>3</sub>).

**(4*S*,6*S*,7*R*,9*aS*-*cis*)-(-)-6-[(2,2-Dimethylethyl)diphenylsiloxy)methyl]-7-hydroxy-4-(phenylsulfonylmethyl)octahydro-2*H*-quinolizine (**11**)**

To a stirred solution of (-)-**10** (583 mg, 1.54 mmol) in EtOH (40 mL) was added 10% HCl (3 mL), then the resulting mixture was refluxed for 30 min. After cooling, the solvent was evaporated, and the residue was dissolved in CHCl<sub>3</sub> (30 mL). To the solution was added K<sub>2</sub>CO<sub>3</sub> (3 g), then the suspension was stirred at room temperature for 1 h. Filtration and the evaporation of the filtrate gave a colorless oil, which was used directly in the next step. To a stirred solution of the oil in DMF (5 mL) was added imidazole (160 mg, 2.35 mmol) and TBDPSCl (0.41 mL, 1.58 mmol), then the resulting solution was stirred at 80 °C for 40 min. After cooling, the reaction mixture was diluted with CHCl<sub>3</sub> (20 mL) and 15% K<sub>2</sub>CO<sub>3</sub> (5 mL), and the organic layer was separated. The aqueous layer was extracted with CHCl<sub>3</sub> (10 mL x 5), and the organic extracts were combined, dried over K<sub>2</sub>CO<sub>3</sub>, and evaporated to give a pale yellow oil, which was chromatographed on SiO<sub>2</sub> (20 g, hexane:acetone=10:1) to give (-)-**11** (755 mg, 85%) as a colorless solid (mp 160~163 °C).

IR (KBr) cm<sup>-1</sup>: 3501, 3070, 2935, 2891, 2857, 1589, 1448, 1428, 1300, 1289, 1144, 1113, 1085, 1058, 806, 746, 703, 689; <sup>1</sup>H NMR (500 MHz) δ: 0.93 (1H, , *J* = 13.0, 4.5 Hz), 1.06 (9H, s), 1.19 (1H, dm, *J* = 13.0 Hz), 1.24-1.34 (2H, m), 1.39 (1H, qm, *J* = 13.0 Hz), 1.50 (1H, qt-like, *J* = 12.0, 4.5 Hz), 1.59 (1H, dq, *J* = 13.0, 4.5 Hz), 1.67-1.77 (3H, m), 2.61 (1H, dm, *J* = 11.0 Hz), 2.89 (1H, q-like, *J* = 7.5 Hz), 3.18 (1H, dd, *J* = 14.0, 5.5 Hz), 3.20 (1H, br s), 3.18-3.25 (1H, m), 3.61 (1H, dd, *J* = 15.0, 7.0 Hz), 3.69-3.75 (1H, br), 3.71 (1H, dd, *J* = 11.0, 5.5 Hz), 3.88 (1H, dd, *J* = 11.0, 5.0 Hz), 7.34 (2H, t-like, *J* = 7.5 Hz), 7.42-7.49 (7H, m), 7.70-7.74 (6H, m); <sup>13</sup>C NMR (125 MHz) δ: 19.03 (s), 20.34 (t), 22.99 (t), 23.70 (t), 26.74 (q), 26.86 (t), 27.63 (t), 49.48 (d), 49.94 (d), 58.38 (t), 60.44 (d), 66.84 (t), 71.45 (d), 127.81 (d), 127.86 (d), 128.82 (d), 129.92 (d), 129.97 (d), 132.62 (s), 132.81 (s), 133.09 (d), 135.63 (d), 135.65 (d), 140.25 (s); MS: 577 (M<sup>+</sup>), 520 (M<sup>+</sup>-57), 69 (100); HRMS: Calcd. for C<sub>33</sub>H<sub>43</sub>NO<sub>4</sub>Si: 577.2700, Found: 577.2658; [α]<sub>D</sub><sup>26</sup> -1.01 (*c* 1.02, CHCl<sub>3</sub>).

**(4*S*,6*S*,7*R*,9*aS*-*cis*)-(-)-6-[(2,2-Dimethylethyl)diphenylsiloxy)methyl]-7-(methoxymethoxy)-4-(phenylsulfonylmethyl)octahydro-2*H*-quinolizine (**12**)**

To a stirred solution of (-)-**11** (755 mg, 1.31 mmol) in  $\text{CHCl}_3$  (15 mL) was added MOMCl (0.31 mL, 4.08 mmol) and (*i*-Pr) $_2$ EtN (0.83 mL, 4.74 mmol), then the resulting solution was refluxed for 40 min. After cooling, the solvent was evaporated to give an orange oil, which was chromatographed on  $\text{SiO}_2$  (20 g, hexane:acetone=12:1) to give (-)-**12** (753 mg, 93%) as a colorless oil.

IR (neat)  $\text{cm}^{-1}$ : 2925, 1654, 1648, 1560, 1458, 1448, 1429, 1305, 1036, 742;  $^1\text{H}$  NMR (500 MHz)  $\delta$ : 0.81 (1H, tt,  $J = 14.0, 4.5$  Hz), 1.05 (9H, s), 1.22-1.44 (4H, m), 1.56 (1H, q,  $J = 12.5, 4.0$  Hz), 1.66-1.76 (2H, m), 1.82 (1H, qd,  $J = 12.5, 4.0$  Hz), 2.18 (1H, tt,  $J = 14.0, 4.9$  Hz), 2.64 (1H, dm,  $J = 11.5$  Hz), 2.75 (1H, td,  $J = 10.0, 4.5$  Hz), 3.02 (3H, s), 3.06 (1H, dd,  $J = 9.0, 6.0$  Hz), 3.26 (1H, dd,  $J = 14.5, 5.5$  Hz), 3.79 (1H, dd,  $J = 10.0, 6.0$  Hz), 3.81 (1H, dd,  $J = 14.0, 7.5$  Hz), 3.98 (1H, d,  $J = 11.0$  Hz), 4.23 & 4.39 (2H, ABq,  $J = 7.0$  Hz), 4.46-4.53 (1H, m), 7.36-7.46 (5H, m), 7.54 (1H, tt,  $J = 7.5, 1.2$  Hz), 7.74 (2H, dm,  $J = 7.5$  Hz), 7.81-7.84 (2H, m), 7.88 (2H, dm,  $J = 7.5$  Hz);  $^{13}\text{C}$  NMR (125 MHz)  $\delta$ : 19.11 (s), 20.65 (t), 22.59 (t), 22.63 (t), 22.97 (t), 25.70 (t), 26.69 (q), 26.91 (t), 31.56 (t), 49.31 (d), 50.63 (d), 55.42 (q), 58.22 (t), 61.64 (d), 65.69 (t), 74.61 (d), 95.26 (t), 127.46 (d), 127.70 (d), 127.95 (d), 128.75 (d), 129.44 (d), 129.56 (d), 132.92 (d), 133.37 (s), 133.47 (s), 135.80 (d), 135.85 (t), 141.24 (s); MS: 621 ( $\text{M}^+$ ), 564 ( $\text{M}^+ - 57$ ), 352 (100); HRMS: Calcd. for  $\text{C}_{35}\text{H}_{47}\text{NO}_5\text{Si}$ : 621.2973, Found: 621.2932;  $[\alpha]^{26}_{\text{D}} -4.58$  ( $c$  1.24,  $\text{CHCl}_3$ ).

**(4*S*,6*S*,7*R*,9*aS*-*cis*)-(-)-6-(Hydroxymethyl)-7-(methoxymethoxy)-4-(phenylsulfonylmethyl)octahydro-2*H*-quinolizine (**13**)**

To a stirred solution of (-)-**12** (753 mg, 1.21 mmol) in THF (15 mL) was added pyridine (3.6 mL, 44.5 mmol) and 47% HF (0.91 mL) at 0 °C, then the resulting solution was stirred at room temperature for 1.5 h. The reaction was quenched with 30%  $\text{K}_2\text{CO}_3$ , and the aqueous layer was extracted with  $\text{CHCl}_3$  (10 mL x 8). The organic extracts were combined, dried over  $\text{K}_2\text{CO}_3$ , and evaporated to give a colorless oil, which was chromatographed on  $\text{SiO}_2$  (15 g, hexane:acetone=5:1) to give (-)-**13** (443 mg, 95%) as a colorless oil.

IR (neat)  $\text{cm}^{-1}$ : 3502, 3064, 2937, 1447, 1405, 1301, 1212, 1144, 1049, 967, 915, 881, 750, 688;  $^1\text{H}$  NMR (500 MHz)  $\delta$ : 0.89-1.00 (2H, m), 1.14 (1H, br d,  $J = 14.5$  Hz), 1.20 (1H, dq,  $J = 14.0, 3.0$  Hz), 1.41 (1H, qm,  $J = 12.0$  Hz), 1.49 (1H, qt,  $J = 13.0, 4.5$  Hz), 1.70 (1H, dm,  $J = 14.0$  Hz), 1.73-1.84 (3H, m), 2.65-2.70 (2H, br m), 3.08 (1H, dd,  $J = 14.0, 3.0$  Hz), 3.35 (1H, br), 3.38 (3H, s), 3.55 (1H, ddd,  $J = 11.0, 9.0, 4.5$  Hz), 3.82-4.00 (4H, m), 4.70 & 4.72 (2H, ABq,  $J = 6.5$  Hz), 7.55 (2H, tm,  $J = 8.0$  Hz), 7.62 (1H, tt,  $J = 8.0, 1.2$  Hz), 7.94 (2H, dm,  $J = 8.0$  Hz);  $^{13}\text{C}$  NMR (125 MHz)  $\delta$ : 20.60 (t), 21.70 (t), 22.71 (t), 25.79 (t), 26.84 (t), 48.72 (d), 49.06 (d), 55.49 (q), 57.16 (t), 59.10 (d), 73.36 (d), 96.13 (t), 127.83 (d), 129.07 (d), 133.41 (d), 140.67 (s); MS: 383 ( $\text{M}^+$ ), 352 (100); HRMS: Calcd. for  $\text{C}_{19}\text{H}_{29}\text{NO}_5\text{S}$ : 383.1730, Found: 383.1751;  $[\alpha]^{26}_{\text{D}} -3.06$  ( $c$  1.18,  $\text{CHCl}_3$ ).

**(4*S*,6*S*,7*R*,9*aS*-*cis*)-(+)-6-(Iodomethyl)-7-(methoxymethoxy)-4-(phenylsulfonylmethyl)octahydro-2*H*-quinolizine (**14**)**

To a stirred solution of (-)-**13** (443 mg, 1.16 mmol) in benzene (20 mL) was added imidazole (195 mg, 2.87 mmol),  $\text{Ph}_3\text{P}$  (757 mg, 2.89 mmol) and  $\text{I}_2$  (584 mg, 2.30 mmol), then the resulting suspension was stirred at room temperature for 20 min. The reaction was quenched with 10%  $\text{Na}_2\text{S}_2\text{O}_3$  in satd.  $\text{NaHCO}_3$ , and the aqueous layer was extracted with  $\text{CH}_2\text{Cl}_2$  (20 mL x 1, 10 mL x 5). The organic extracts were combined, dried over  $\text{K}_2\text{CO}_3$ , and evaporated to give a pale yellow oil, which was

chromatographed on SiO<sub>2</sub> (20 g, hexane:acetone=15:1) to give (+)-**14** (510 mg, 89%) as a pale yellow oil.

IR (neat) cm<sup>-1</sup>: 3061, 2934, 1448, 1302, 1199, 1036, 968, 917, 750, 719, 688; <sup>1</sup>H NMR (500 MHz) δ: 1.09 (1H, br d, *J* = 12.0 Hz), 1.22-1.32 (1H, br m), 1.39-1.55 (3H, m), 1.61-1.81 (4H, m), 1.86-1.93 (1H, br m), 2.16 (1H, br d, *J* = 8.0 Hz), 2.82 (1H, br d, *J* = 12.0 Hz), 3.12-3.19 (2H, m), 3.33-3.39 (1H, m), 3.36 (3H, s), 3.43 (1H, br d, *J* = 10.0 Hz), 3.70 (1H, d-like, *J* = 10.0 Hz), 3.73 (1H, dd, *J* = 13.0, 11.0 Hz), 4.64 & 4.69 (2H, ABq, *J* = 6.8 Hz), 7.55 (2H, t-like, *J* = 7.5 Hz), 7.63 (1H, t-like, *J* = 7.5 Hz), 7.93 (2H, d-like, *J* = 7.5 Hz); <sup>13</sup>C NMR (125 MHz) δ: 11.08 (t), 19.77 (t), 19.78 (t), 23.49 (t), 24.93 (t), 27.64 (t), 48.41 (d), 50.24 (d), 55.77 (q), 56.06 (d), 58.71 (t), 76.75 (d), 95.58 (t), 128.06 (d), 129.29 (d), 133.63 (d), 139.94 (s); MS: 493 (M<sup>+</sup>), 366 (100); HRMS: Calcd. for C<sub>19</sub>H<sub>28</sub>INO<sub>4</sub>S: 493.0747, Found: 493.0787; [α]<sub>D</sub><sup>26</sup> +30.9 (*c* 2.78, CHCl<sub>3</sub>).

**(4*S*,6*S*,7*R*,9*aS*-*cis*)-(-)-7-(Methoxymethoxy)-6-methyl-4-(phenylsulfonylmethyl)-octahydro-2*H*-quinolizine (15)**

To a stirred solution of (+)-**14** (510 mg, 1.03 mmol) in toluene (15 mL) was added *n*-Bu<sub>3</sub>SnH (0.35 mL, 1.24 mmol) and AIBN (34 mg, 0.21 mmol), then the resulting solution was refluxed for 16 h. After cooling, the solvent was evaporated, and the residue was dissolved with MeCN (25 mL), and the solution was washed with hexane (6 mL x 8), then the solvent was evaporated. The residue was chromatographed on SiO<sub>2</sub> (15 g, hexane:acetone=14:1) to give (-)-**15** (358 mg, 94%) as a colorless oil.

IR (neat) cm<sup>-1</sup>: 3061, 2935, 1447, 1304, 1148, 1106, 1086, 1036, 750, 689; <sup>1</sup>H NMR (500 MHz) δ: 0.89-0.94 (1H, m), 0.99 (1H, tt, *J* = 15.0, 5.0 Hz), 1.04 (3H, d, *J* = 5.9 Hz), 1.22-1.37 (3H, m), 1.54 (1H, tt, *J* = 13.0, 4.0 Hz), 1.67-1.83 (4H, m), 2.61 (1H, dm, *J* = 12.5 Hz), 2.72-2.78 (1H, m), 2.82 (1H, tt, *J* = 11.0, 4.5 Hz), 3.26 (1H, dd, *J* = 14.5, 6.0 Hz), 3.35 (3H, s), 3.63 (1H, dd, *J* = 14.5, 7.0 Hz), 3.82 (1H, br q, *J* = 5.5 Hz), 4.56 & 4.68 (2H, ABq, *J* = 7.0 Hz), 7.53 (2H, t-like, *J* = 8.0 Hz), 7.60 (1H, tt-like, *J* = 8.0, 1.0 Hz), 7.91 (2H, dm, *J* = 8.0 Hz); <sup>13</sup>C NMR (125 MHz) δ: 15.39 (q), 20.45 (t), 20.97 (t), 22.23 (t), 25.82 (t), 27.70 (t), 48.93 (d), 49.15 (d), 53.02 (d), 55.54 (q), 58.13 (t), 79.31 (d), 95.58 (t), 128.07 (d), 128.84 (d), 133.16 (d), 140.53 (s); MS: 367 (M<sup>+</sup>), 212 (100); HRMS: Calcd. for C<sub>19</sub>H<sub>29</sub>NO<sub>4</sub>S: 367.1796, Found: 367.1830; [α]<sub>D</sub><sup>26</sup> -10.95 (*c* 0.81, CHCl<sub>3</sub>).

**(4*S*,6*S*,7*R*,9*aS*-*cis*)-(-)-4-(Deca-7,9-dienyl)-7-(methoxymethoxy)-6-methyloctahydro-2*H*-quinolizine (16)**

To a stirred solution of (-)-**15** (76 mg, 0.21 mmol) in THF (2 mL) was added *n*-BuLi (0.15 mL, 0.23 mmol) at -80 °C, then the resulting solution was stirred for 10 min. To the solution was added *trans*-2-nonenal (0.07 mL, 0.42 mmol) at -80 °C, then the reaction mixture was stirred at -50 °C for 1 h. The reaction was quenched with 15 % K<sub>2</sub>CO<sub>3</sub>, and the aqueous layer was extracted with CHCl<sub>3</sub> (10 mL x 5). The organic extracts were combined, dried over K<sub>2</sub>CO<sub>3</sub>, and evaporated to give a pale yellow oil, which was used directly in the next step. To a stirred solution of the above oil in MeOH (5 mL) was added Na<sub>2</sub>HPO<sub>4</sub> (220 mg, 1.55 mmol) and 5% Na-Hg (1.8 g), then the resulting suspension was stirred at room temperature for 2 h. The reaction was quenched with 15% K<sub>2</sub>CO<sub>3</sub>, and the aqueous layer was extracted with CHCl<sub>3</sub> (10 mL x 4). The organic extracts were combined, dried over K<sub>2</sub>CO<sub>3</sub>, and evaporated to give a pale yellow oil, which was chromatographed on SiO<sub>2</sub> (15 g, hexane:acetone=20:1) to give (-)-**16** (38 mg, 53%) as a colorless oil.



IR (neat)  $\text{cm}^{-1}$ : 2926, 1654, 1560, 1543, 1508, 1459, 1104, 1040, 990;  $^1\text{H}$  NMR (500 MHz)  $\delta$ : 0.88 (3H, t,  $J = 7.0$  Hz), 1.12 (3H, d,  $J = 6.5$  Hz), 1.24-1.31 (7H, m), 1.36 (2H, quint-like,  $J = 7.0$  Hz), 1.45-1.56 (3H, m), 1.57-1.64 (2H, m), 1.70-1.76 (2H, m), 1.87 (1H, tt-like,  $J = 12.5, 3.8$  Hz), 1.91-1.99 (1H, m), 2.05 (2H, br q,  $J = 6.5$  Hz), 3.18-3.23 (1H, m), 3.27-3.33 (1H, m), 3.35 (3H, s), 3.39 (1H, q,  $J = 4.0$  Hz), 3.84 (1H, td,  $J = 8.0, 3.0$  Hz), 4.61 (2H, s), 5.52 (1H, dd,  $J = 14.0, 7.5$  Hz), 5.58 (1H, dt,  $J = 14.0, 7.1$  Hz), 6.03 (1H, dd,  $J = 14.0, 10.0$  Hz), 6.09 (1H, dd,  $J = 14.0, 10.0$  Hz);  $^{13}\text{C}$  NMR (125 MHz)  $\delta$ : 14.10 (q), 17.12 (q), 19.68 (t), 22.05 (t), 22.59 (t), 25.92 (t), 28.91 (t), 29.32 (t), 29.38 (t), 31.24 (t), 31.72 (t), 32.63 (t), 49.13 (d), 52.95 (d), 55.27 (q), 57.64 (d), 75.44 (d), 94.42 (t), 130.13 (d), 131.01 (d), 133.35 (d), 136.26 (d); MS: 349 ( $\text{M}^+$ ), 334 (100); HRMS: Calcd. for  $\text{C}_{22}\text{H}_{39}\text{NO}_2$ : 349.3018, Found: 349.3001;  $[\alpha]^{26}_{\text{D}} -20.7$  (c 0.81,  $\text{CHCl}_3$ ).

#### (+)-clavepictine B (2)

To a stirred solution of (-)-16 (38 mg, 0.11 mmol) in MeOH (2 mL) was added c. HCl (2 drops), then the resulting solution was refluxed for 4 h. After cooling, the reaction was quenched with 15 %  $\text{K}_2\text{CO}_3$ , and the solvent was evaporated. The residue was extracted with hot  $\text{CHCl}_3$  (5 mL x 10), and the organic extracts were combined, evaporated to give a colorless oil, which was chromatographed on  $\text{SiO}_2$  (10 g,  $\text{CHCl}_3$ :MeOH=10:1) to give (+)-2 (27 mg, 82%) as a colorless solid (mp 70~72  $^\circ\text{C}$ , lit<sup>1</sup> mp 70~72  $^\circ\text{C}$ ).

IR (KBr)  $\text{cm}^{-1}$ : 3202, 3019, 2923, 2855, 1659, 1443, 1368, 1340, 1278, 1202, 1151, 1055, 1039, 1029, 990, 950;  $^1\text{H}$  NMR (500 MHz,  $\text{C}_5\text{D}_5\text{N}$ )  $\delta$ : 0.81 (3H, t,  $J = 7.0$  Hz), 1.15-1.27 (7H, br m), 1.29 (3H, d,  $J = 6.5$  Hz), 1.29-1.35 (2H, m), 1.36-1.43 (1H, m), 1.48-1.59 (2H, m), 1.60-1.72 (3H, m), 1.77-1.86 (2H, m), 1.90-1.96 (1H, m), 2.05 (2H, q,  $J = 7.0$  Hz), 3.11-3.16 (1H, m), 3.32 (1H, quint,  $J = 6.0$  Hz), 3.62 (1H, quint-like,  $J = 5.0$  Hz), 4.04 (1H, br q,  $J = 5.0$  Hz), 5.65 (1H, dt,  $J = 15.0, 7.0$  Hz), 5.78 (1H, d,  $J = 5.5$  Hz), 5.87 (1H, dd,  $J = 15.0, 7.0$  Hz), 6.22 (1H, dd,  $J = 15.0, 10.0$  Hz), 6.38 (1H, dd,  $J = 15.0, 10.0$  Hz);  $^{13}\text{C}$  NMR (125 MHz,  $\text{C}_5\text{D}_5\text{N}$ )  $\delta$ : 14.24 (q), 16.79 (q), 20.60 (t), 22.84 (t), 26.07 (t), 27.87 (t), 28.10 (t), 29.12 (t), 29.34 (t), 29.70 (t), 31.92 (t), 32.95 (t), 49.47 (d), 56.67 (d), 57.21 (d), 71.87 (d), 130.87 (d), 131.23 (d), 133.02 (d), 137.03 (d);  $[\alpha]^{26}_{\text{D}} +25.7$  (c 0.61,  $\text{CH}_2\text{Cl}_2$ ).

#### (-)-clavepictine A (1)

To a stirred solution of (+)-2 (25 mg, 0.082 mmol) in pyridine (0.3 mL) was added  $\text{Ac}_2\text{O}$  (0.1 mL), then the resulting solution was stirred at room temperature for 5 h. The volatile was evaporated, and the residue was chromatographed on  $\text{SiO}_2$  (10 g, hexane:acetone=16:1) to give (-)-1 (26 mg, 90%) as a colorless oil.

IR (neat)  $\text{cm}^{-1}$ : 3016, 2928, 2856, 1736, 1654, 1560, 1458, 1376, 1246, 1162, 1108, 1029, 990, 962;  $^1\text{H}$  NMR (500 MHz,  $\text{C}_5\text{D}_5\text{N}$ )  $\delta$ : 0.80 (3H, t,  $J = 7.1$  Hz), 0.95 (1H, dq-like,  $J = 12.6, 3.0$  Hz), 1.10 (3H, d,  $J = 7.1$  Hz), 1.12-1.24 (6H, m), 1.26-1.35 (3H, m), 1.42-1.50 (4H, br m), 1.58 (1H, dm,  $J = 13.0$  Hz), 1.75 (1H, dq,  $J = 13.0, 4.0$  Hz), 1.84 (1H, tt,  $J = 11.0, 4.0$  Hz), 1.93 (1H, qd-like,  $J = 13.0, 4.0$  Hz), 2.04 (2H, q-like,  $J = 6.0$  Hz), 2.15 (3H, s), 3.11 (1H, dm,  $J = 10.0$  Hz), 3.50 (1H, qd-like,  $J = 7.0, 2.5$  Hz), 3.85 (1H, td,  $J = 8.0, 3.0$  Hz), 4.70 (1H, q,  $J = 3.0$  Hz), 5.66 (1H, dd,  $J = 15.0, 7.0$  Hz), 5.73 (1H, dt,  $J = 15.0, 7.0$  Hz), 6.17 (1H, dd,  $J = 15.0, 10.5$  Hz), 6.31 (1H, dd,  $J = 15.0, 10.5$  Hz);  $^{13}\text{C}$  NMR (125 MHz,  $\text{CDCl}_3$ )  $\delta$ : 14.10 (q), 17.20 (q), 19.68 (t), 20.59 (t), 21.60 (t),

22.59 (t), 25.68 (q), 28.96 (t), 29.29 (t), 31.72 (t), 32.63 (t), 49.00 (d), 52.89 (d), 58.01 (d), 73.29 (d), 129.97 (d), 130.95 (d), 133.58 (d), 136.15 (d), 170.34 (s);  $[\alpha]^{26}_{\text{D}} -74.5$  (c 0.55,  $\text{CH}_2\text{Cl}_2$ ).
